# Supplementary material for: Mechanochemical synthesis and application of mixed-metal copper–ruthenium HKUST-1 metal–organic frameworks in the electrocatalytic oxygen evolution reaction
Source: Royal Society of Chemistry journal article supplement (doi:10.1039/d4mr00021h), 2024-01-01
Supplement: d4mr00021h1.pdf [file d4mr00021h1.pdf]

## Electronic Supplementary Information (ESI)

### **Mechanochemical synthesis and application of mixed-metal copper-ruthenium HKUST-1 metal-organic frameworks in the electrocatalytic oxygen evolution reaction**

Linda Sondermann,<sup>a</sup> Quentin Smith,<sup>a,b</sup> Till Strothmann,<sup>a</sup> Annette Vollrath,<sup>a</sup> Thi Hai Yen Beglau,<sup>a</sup> and Christoph Janiak <sup>\*a</sup>

<sup>a</sup>. Institut für Anorganische Chemie und Strukturchemie, Heinrich-Heine-Universität Düsseldorf, 40204 Düsseldorf, Germany

<sup>b</sup>. Department of Chemistry, Virginia Polytechnic Institute and State University, Blacksburg, VA 24061, USA

\* Correspondence: janiak@uni-duesseldorf.de (C.J.)

Email addresses: linda.sondermann@hhu.de, qsmith1713@vt.edu, till.strothmann@hhu.de, annette.vollrath@hhu.de, beglau@hhu.de

## Brief HKUST-1 structure description

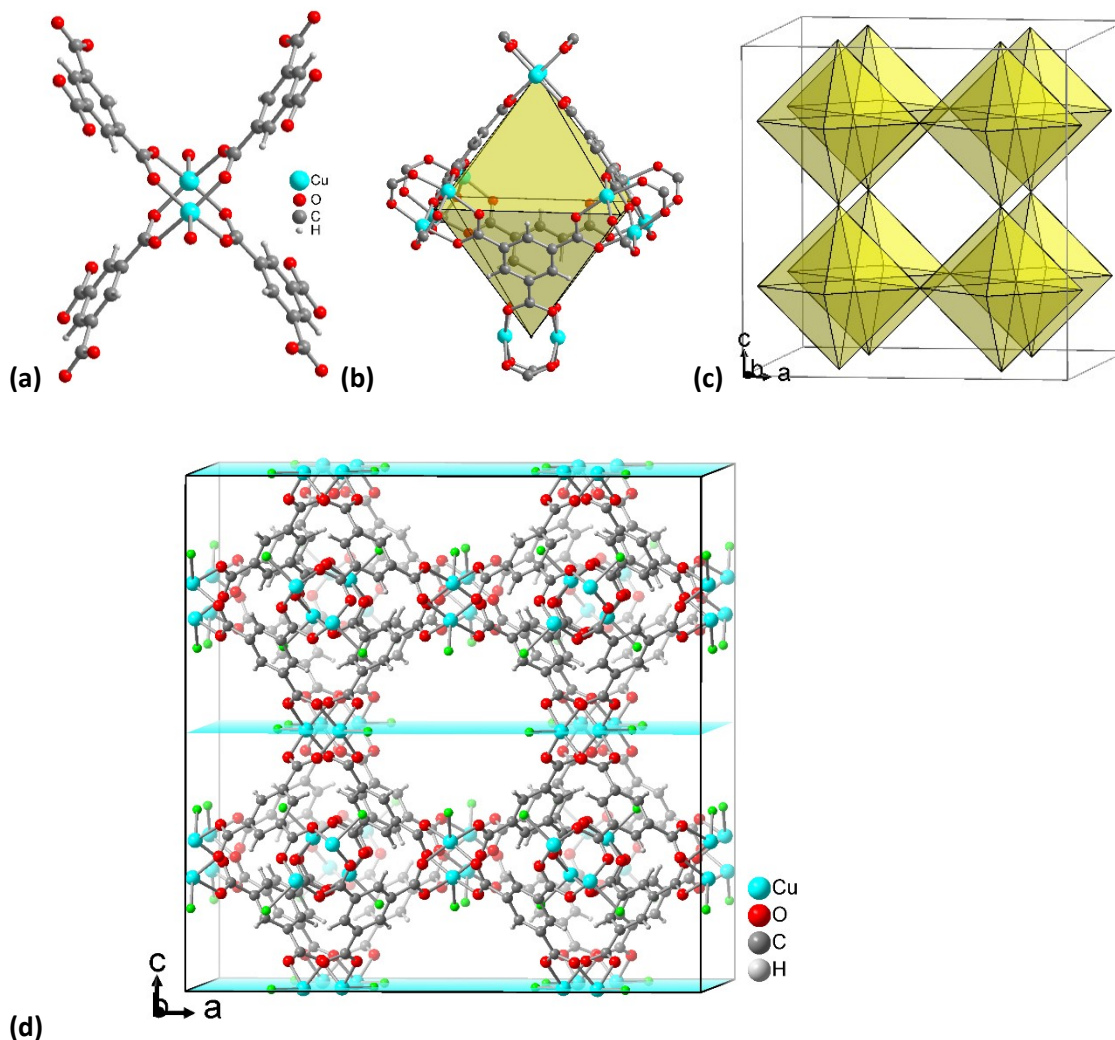

**Fig. S1** (a)  $\{Cu_2(btc)_4\}$  "paddle-wheel" unit in Cu-BTC (HKUST-1).

(b) The  $\{Cu\}_2$  dumbbells sit at the corners of an octahedron. Four btc ligands span opposite four of the eight faces of the octahedron, forming octahedral side (A) cavities (5 Å) which are connected to the main channels by triangular windows (3.5 Å).

(c) These octahedra form a porous cubic 3D network via vertex linkage. Inside eight octahedra are larger cuboctahedral pores (11 Å, B and C cages depending on the position of the labile axial ligand), which are surrounded by eight octahedral faces and 12 paddle-wheel subunits. These cuboctahedral pores are connected through square-shaped windows (9 Å) giving channels along the *a*, *b*, and *c* axis. The specific surface area reaches ~1300-1500 m<sup>2</sup>/g.

(d) The unit cell packing in HKUST-1 with the (002) lattice planes shown in cyan. In the cubic crystal system, the lattice planes (002) = (020) = (200) are equivalent to by the symmetry of the lattice. The possible aqua ligands on Cu are depicted in green for differentiation to the carboxylate O atoms.

## Energy-dispersive X-ray spectroscopy (EDX) from scanning electron microscopy (SEM)

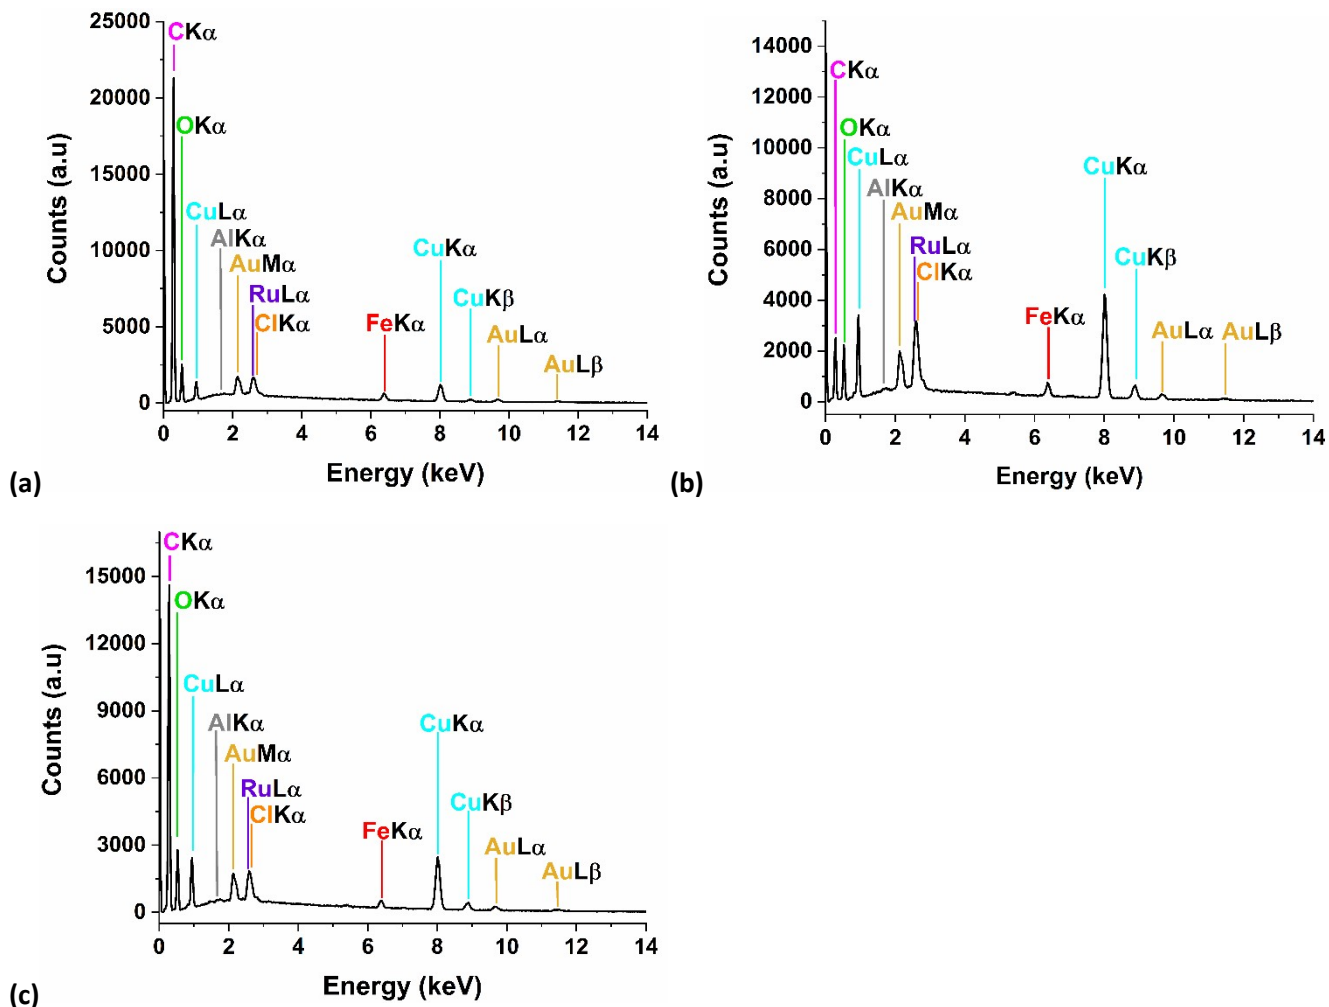

**Fig. S2** SEM-EDX spectra of (a)  $\text{Cu}_6\text{Ru-BTC}$ , (b)  $\text{Cu}_7\text{Ru-BTC}$  and (c)  $\text{Cu}_{10}\text{Ru-BTC}$ . The Al and Au signals in the EDX spectra can be attributed to the Al sample holder and the sputtering of the sample with gold before the measurement.

### Scanning electron microscopy (SEM)

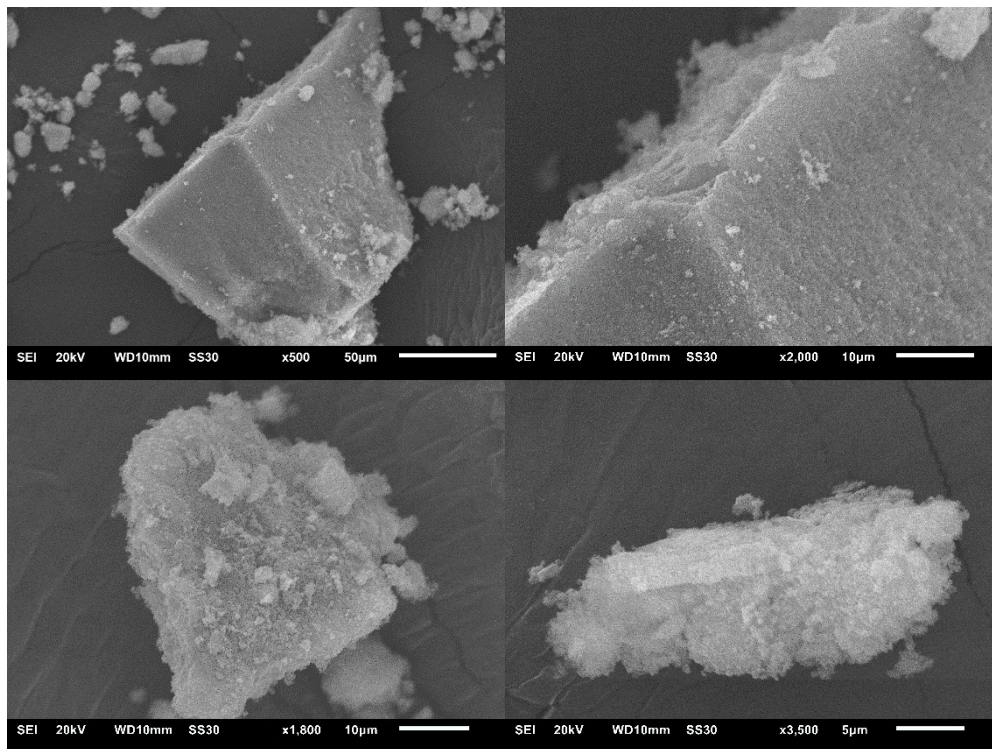

**Fig. S3** Mechanochemically synthesized HKUST-1 SEM images.

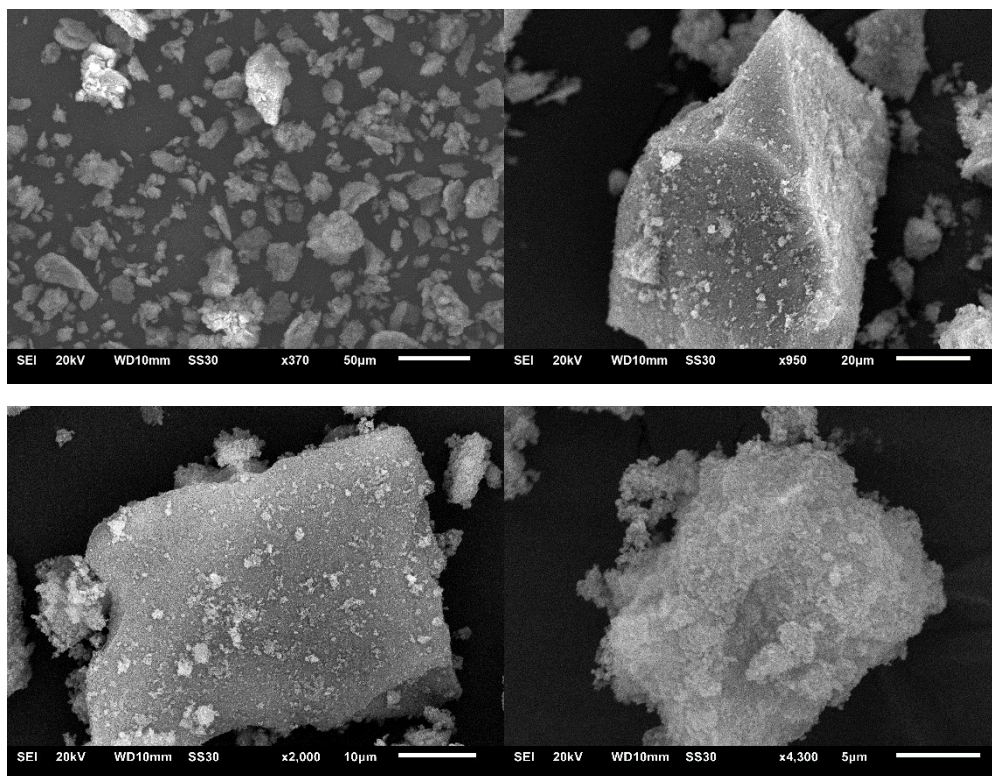

**Fig. S4** Cu<sub>6</sub>Ru-BTC SEM images.

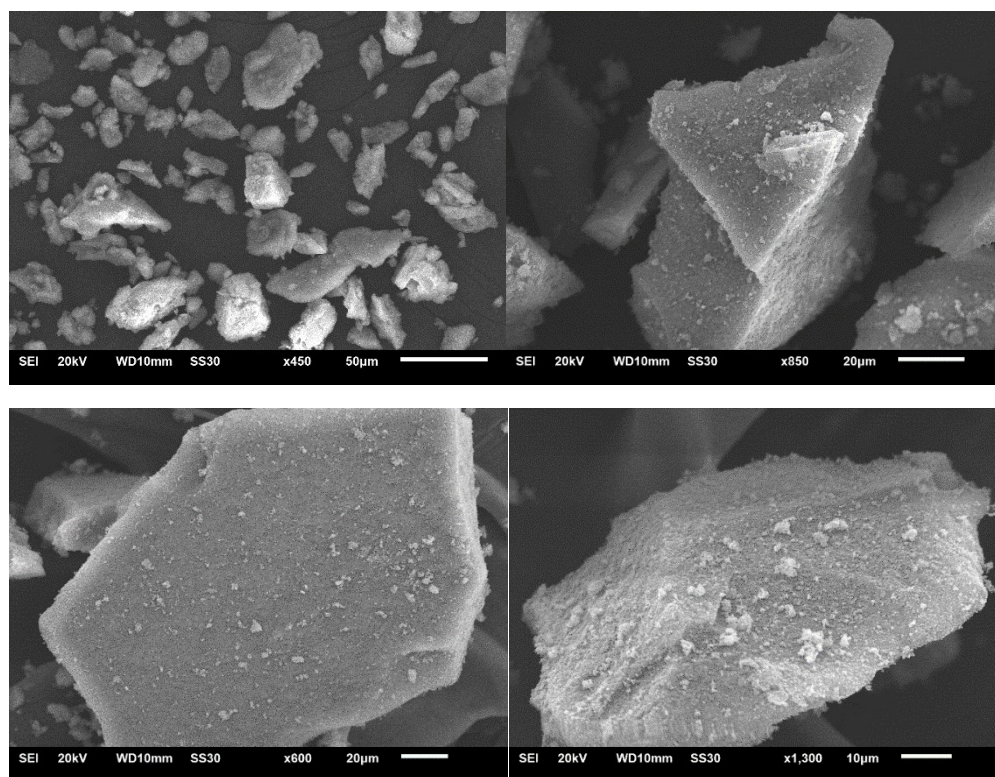

Fig. S5  $\text{Cu}_7\text{Ru}$  SEM images.

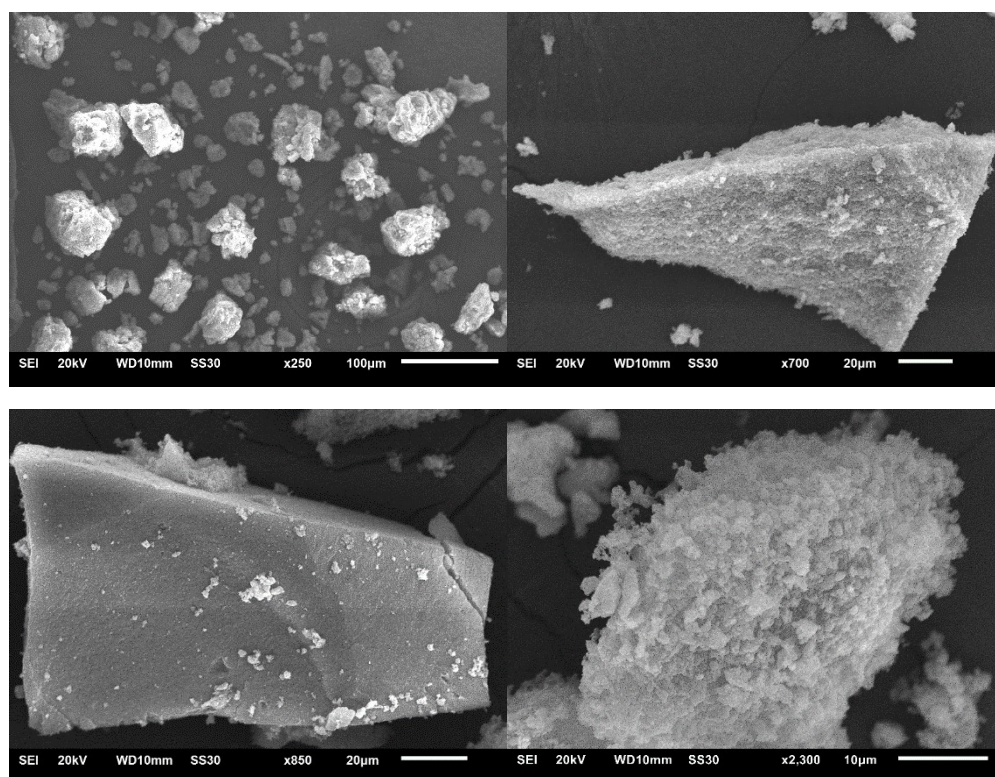

Fig. S6  $\text{Cu}_{10}\text{Ru}$  SEM images.

### Transmission electron microscopy (TEM) images with EDX

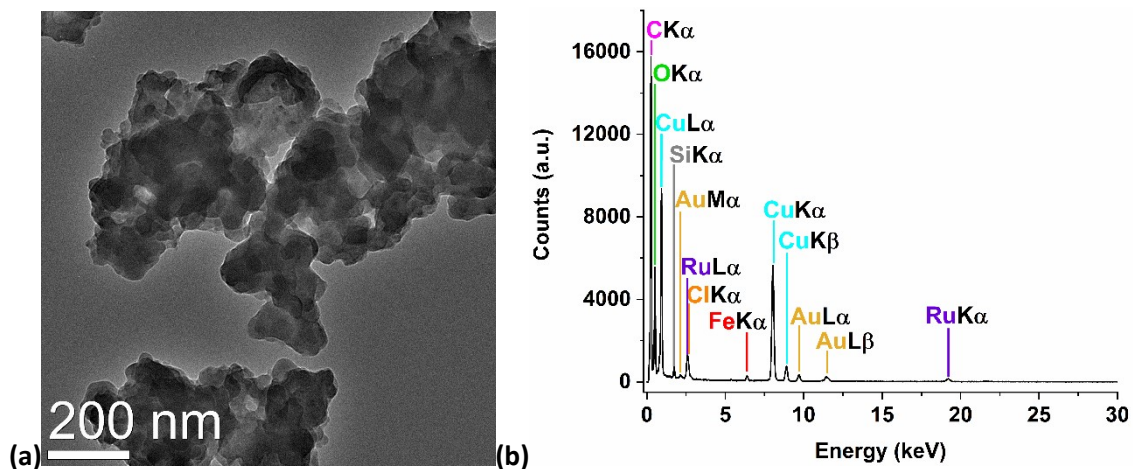

Fig. S7 (a) Transmission electron microscopy (TEM) image of  $\text{Cu}_6\text{Ru-BTC}$ , (b) TEM-EDX of  $\text{Cu}_6\text{Ru-BTC}$ .

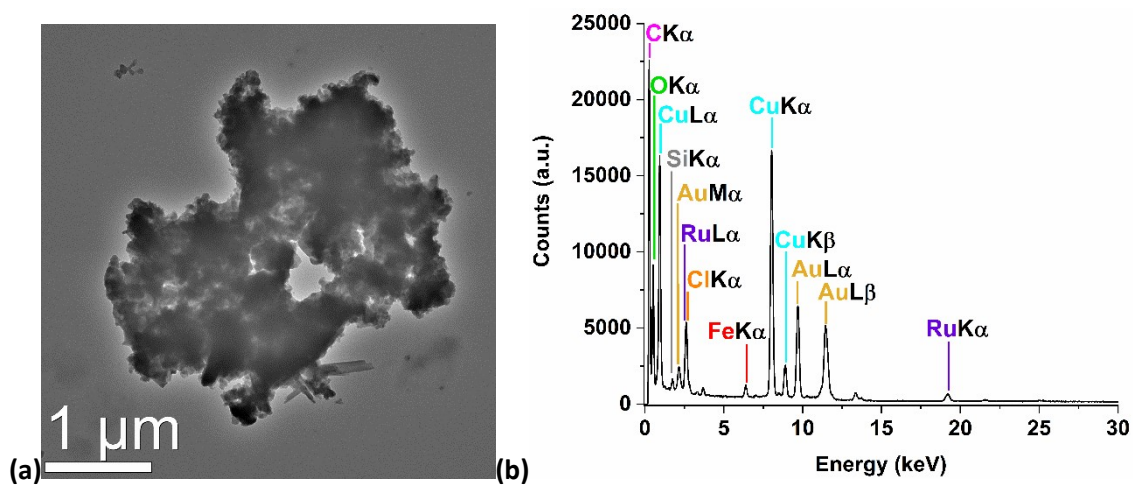

Fig. S8 (a) TEM image of  $\text{Cu}_8\text{Ru-BTC}$ , (b) TEM-EDX of  $\text{Cu}_8\text{Ru-BTC}$ .

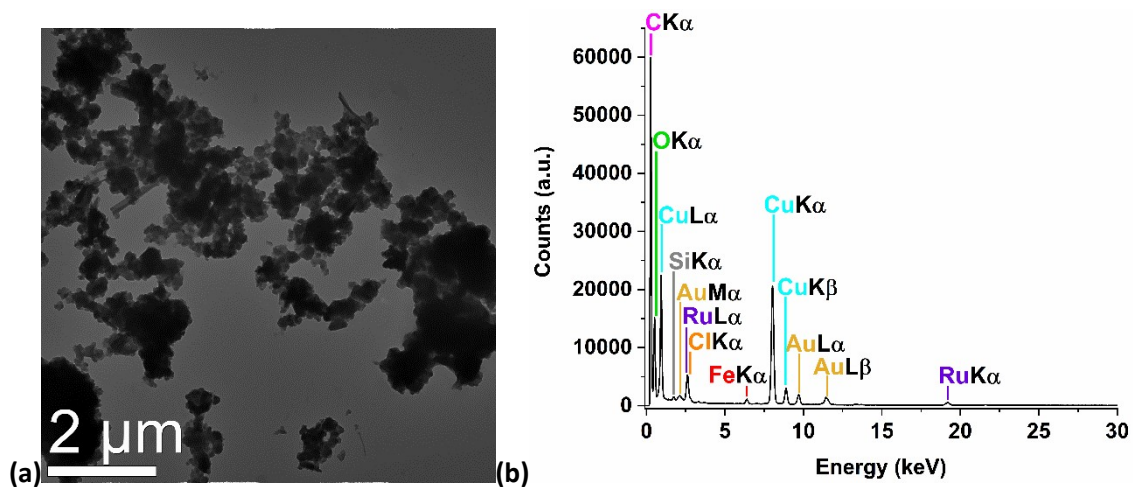

Fig. S9 (a) TEM image of  $\text{Cu}_{10}\text{Ru-BTC}$ , (b) TEM-EDX of  $\text{Cu}_{10}\text{Ru-BTC}$ .

Powder X-ray diffraction (PXRD)

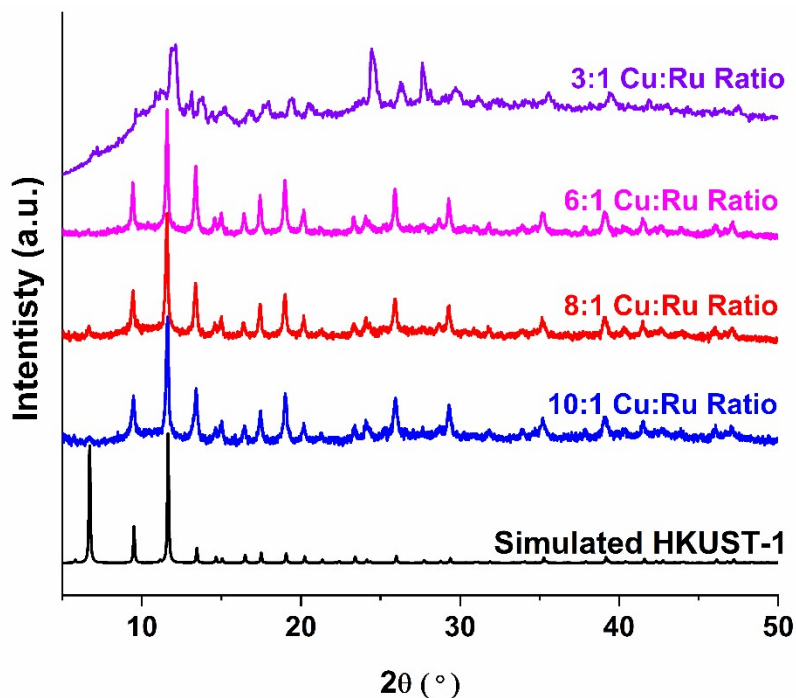

Fig. S10 PXRD patterns of  $\text{Cu}_6\text{Ru-BTC}$  (6:1 Cu:Ru),  $\text{Cu}_7\text{Ru-BTC}$  (8:1 Cu:Ru),  $\text{Cu}_{10}\text{Ru-BTC}$  (10:1 Cu:Ru), simulated HKUST-1 (CCDC no. 112954) and the attempted 3:1 Cu:Ru sample.

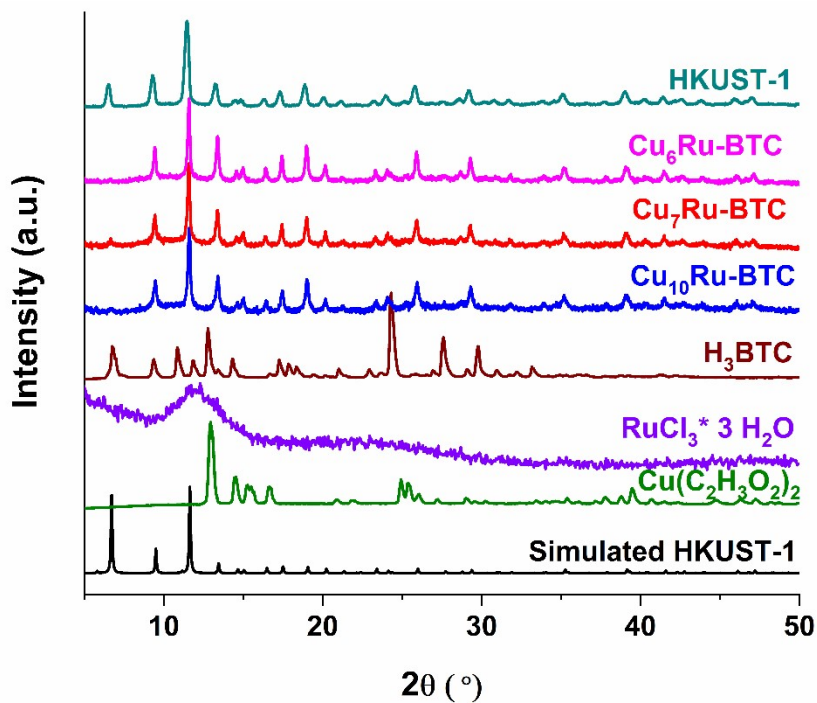

Fig. S11 PXRD patterns of  $\text{Cu}_6\text{Ru-BTC}$ ,  $\text{Cu}_7\text{Ru-BTC}$ ,  $\text{Cu}_{10}\text{Ru-BTC}$ , mechanochemically synthesized HKUST-1, simulated HKUST-1 (CCDC no. 112954) and their educts.

## Thermogravimetric analysis (TGA)

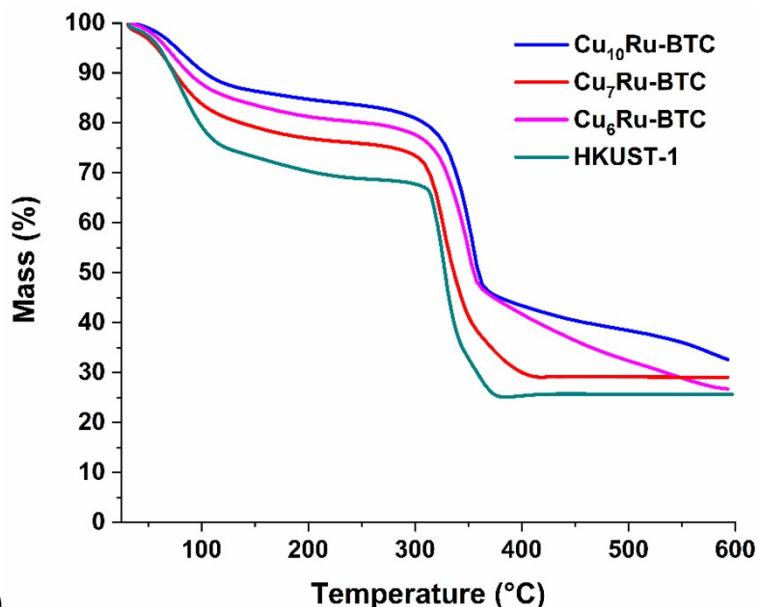

(a)

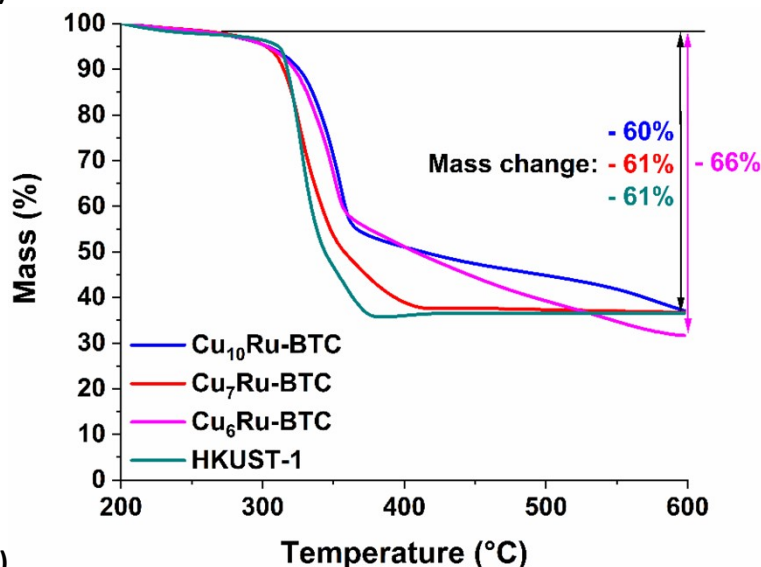

(b)

**Fig. S12** (a) TGA data of  $\text{Cu}_6\text{Ru-BTC}$ ,  $\text{Cu}_7\text{Ru-BTC}$ ,  $\text{Cu}_{10}\text{Ru-BTC}$  and mechanochemically synthesized HKUST-1. For the TGA, the samples were used as-synthesized and had not been activated. (b) Rescaled TGA data of (a) by setting the value at 200 °C to 100%. A heating rate of 10 K/min under a  $\text{N}_2$  atmosphere was used.

The residual mass of the TGA was slightly higher than the theoretical mass for Cu metal of 31.5 wt% and slightly higher for  $\text{Cu}_x\text{Ru}$ , which is probably due to the formation of CuO in a mixture with Cu and  $\text{Cu}_2\text{O}$  (respectively Ru/ $\text{RuO}_x$ ), from the Cu(Ru)-O bonds in the framework, which was also seen by Chen *et al.* even while measuring under high purity nitrogen atmosphere.<sup>1</sup> For simplicity we have only calculated with the formation of CuO. The expected theoretical residual mass of CuO for HKUST-1 would be 39.5 wt%. To correlate the mass loss of the linker to the residual metal oxide mass, the TGA is replotted by starting after the solvent loss at 200 °C with 100%. The values for the linker to the metal oxide mass loss are collected in Table S1. When the mass loss of the linker between ~280-600 °C is related to the residual mass (set as CuO), molar linker:metal ratios in the range of 1.8:3.2 to 2.0:2.7 are



obtained. The theoretical molar BTC:Cu ratio in HKUST-1 is 2:3, corresponding to 60.5 wt% BTC and 39.5 wt% CuO.

**Table S1** TGA values for the linker mass loss and residual mass and the resulting linker (BTC) to metal (Cu) molar ratio.<sup>a</sup>

|                                                     | BTC (wt%) | CuO (residual wt%) | molar linker to metal ratio |
|-----------------------------------------------------|-----------|--------------------|-----------------------------|
| <b>Cu<sub>10</sub>Ru-BTC</b>                        | 60.1      | 39.9               | 1.83:3.17                   |
| <b>Cu<sub>7</sub>Ru-BTC</b>                         | 60.7      | 39.3               | 1.85:3.12                   |
| <b>Cu<sub>6</sub>Ru-BTC</b>                         | 65.7      | 34.3               | 2.00:2.72                   |
| <b>HKUST-1</b>                                      | 60.8      | 39.2               | 1.85:3.11                   |
| <b>[Cu<sub>3</sub>(BTC)<sub>2</sub>] calculated</b> | 60.5      | 39.5               | 2:3                         |

<sup>a</sup> For the Cu<sub>x</sub>Ru-BTC samples, the values for HKUST-1 are used for comparison and the residual wt% was taken as CuO only. No individual % calculations to estimate the BTC loss and residual Cu/Ru-oxide content was done for simplicity. Also the probably formation of a mixture of Cu(Ru), Cu<sub>2</sub>O and CuO (Ru-oxides) is not taken into account.

### Elemental analysis

We analyzed the samples via CH elemental analysis and the results can be found in Table S2 below. As an example, the found values for HKUST-1 ([Cu<sub>3</sub>(BTC)<sub>2</sub>]) were 30.43% C and 3.34% H. This matches the mass% of C and H for, e.g., [Cu<sub>3</sub>(BTC)<sub>2</sub>] · 10 H<sub>2</sub>O 10 MeOH with 30.42% C and 3.29% H, which approximates the content of solvent molecules in this sample (Table S2<sup>†</sup>). Further, from the mass loss in the TGA up to 200 °C, the solvent content in the samples lies between 10-30 wt% which correlates with the approximations from CH analysis (Table S2<sup>†</sup>).

**Table S2** CH elemental analysis of the MOF samples.<sup>a</sup>

|                                                     | exp. values |       | calculated to estimate solvent content <sup>b</sup>                           |       |       | wt% solvent from TGA (cf. Fig. S12a) |
|-----------------------------------------------------|-------------|-------|-------------------------------------------------------------------------------|-------|-------|--------------------------------------|
|                                                     | C (%)       | H (%) | [Cu <sub>3</sub> (BTC) <sub>2</sub> ]·xsolvent (wt% solvent)                  | C (%) | H (%) |                                      |
| <b>Cu<sub>10</sub>Ru-BTC</b>                        | 29.14       | 3.62  | [Cu <sub>3</sub> (BTC) <sub>2</sub> ] · 8 H <sub>2</sub> O<br>0.5 MeOH (21)   | 29.04 | 2.97  | 9 (100 °C)<br>15 (200°C)             |
| <b>Cu<sub>7</sub>Ru-BTC</b>                         | 31.54       | 3.04  | [Cu <sub>3</sub> (BTC) <sub>2</sub> ] · 5.5 H <sub>2</sub> O<br>1.5 MeOH (20) | 31.14 | 2.49  | 16 (100 °C)<br>23 (200°C)            |
| <b>Cu<sub>6</sub>Ru-BTC</b>                         | 32.37       | 3.13  | [Cu <sub>3</sub> (BTC) <sub>2</sub> ] · 5 H <sub>2</sub> O 3<br>MeOH (24)     | 31.88 | 2.43  | 12 (100 °C)<br>18 (200°C)            |
| <b>HKUST-1</b>                                      | 30.43       | 3.34  | [Cu <sub>3</sub> (BTC) <sub>2</sub> ] · 8 H <sub>2</sub> O<br>5 MeOH (33)     | 30.38 | 3.00  | 21 (100 °C)<br>30 (200°C)            |
| <b>[Cu<sub>3</sub>(BTC)<sub>2</sub>] calculated</b> | 35.74       | 1.00  |                                                                               |       |       |                                      |

<sup>a</sup> Methanol (MeOH) was used in the mechanochemical synthesis and water (H<sub>2</sub>O) can be due to crystal water from the educts, which were used in the mechanochemical synthesis, and adsorbed as moisture from the air. <sup>b</sup> In the % calculations to estimate the solvent content the Ru content or the exchange of 14 mol% (in Cu<sub>6</sub>Ru) to 9 mol% (in Cu<sub>10</sub>Ru) with the higher mass or Ru (101.07 g/mol) vs. Cu (63.55 g/mol) was neglected for simplicity.

**Table S3** Cu and Ru analysis from AAS.

|                              | Measured Cu (mg/L) | Calculated Cu (mg/L) <sup>a</sup> | Cu (mol/L)            | Measured Ru (mg/L) | Calculated Ru (mg/L) <sup>b</sup> | Ru (mol/L)            |
|------------------------------|--------------------|-----------------------------------|-----------------------|--------------------|-----------------------------------|-----------------------|
| <b>Cu<sub>10</sub>Ru-BTC</b> | 0.800              | 40.00                             | $6.30 \times 10^{-4}$ | 5.601              | 6.220                             | $6.20 \times 10^{-5}$ |
| <b>Cu<sub>7</sub>Ru-BTC</b>  | 0.767              | 38.35                             | $6.04 \times 10^{-4}$ | 7.467              | 8.300                             | $8.22 \times 10^{-5}$ |
| <b>Cu<sub>6</sub>Ru-BTC</b>  | 0.729              | 36.45                             | $5.74 \times 10^{-4}$ | 8.162              | 9.070                             | $8.98 \times 10^{-6}$ |

<sup>a</sup> In sample solution before 1:50 (v:v) dilution for the measurement; the Cu calibration curve was straight line going through the point of origin (0; 0). <sup>b</sup> In sample solution before 9:1 (v:v) dilution for the measurement of Ru, the dilution was brought about by the addition of 1 mL of a LaCl<sub>3</sub> × 7 H<sub>2</sub>O solution (c = 10 g/L in 10% HCl) added to 9 mL of the analysis solution; the Ru calibration curve was going through the point of origin (0; 0).

### Infrared spectroscopy (IR)

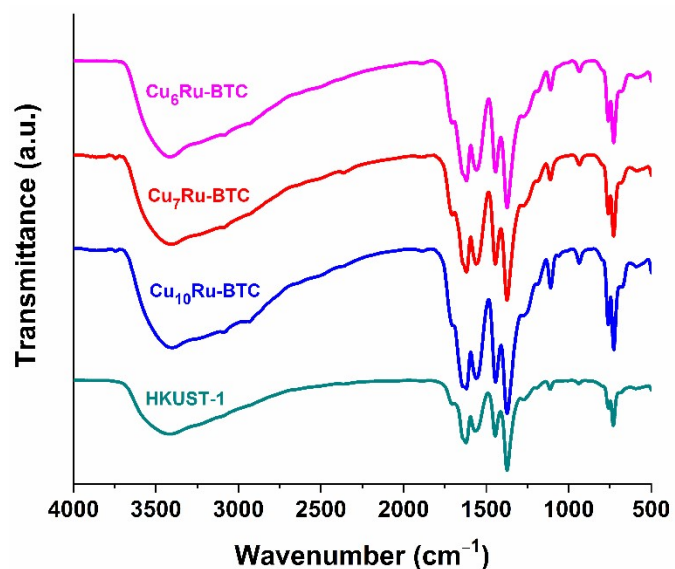**Fig. S13** FT-IR spectra for Cu<sub>6</sub>Ru-BTC, Cu<sub>7</sub>Ru-BTC, Cu<sub>10</sub>Ru-BTC and mechanochemically synthesized HKUST-1.

### Porosity related parameters derived from N<sub>2</sub>-sorption measurements

**Table S4** Porosity related parameters for all samples derived from N<sub>2</sub>-sorption measurements.

|                              | BET surface area <sup>a</sup><br>(m <sup>2</sup> /g) | Total pore volume <sup>b</sup><br>(cm <sup>3</sup> /g) | Main pore width maximum <sup>c</sup><br>(nm) |
|------------------------------|------------------------------------------------------|--------------------------------------------------------|----------------------------------------------|
|                              |                                                      |                                                        | NLDFT                                        |
| <b>Cu<sub>10</sub>Ru-BTC</b> | 603                                                  | 0.46                                                   | 0.89                                         |
| <b>Cu<sub>7</sub>Ru-BTC</b>  | 611                                                  | 0.47                                                   | 0.86                                         |
| <b>Cu<sub>6</sub>Ru-BTC</b>  | 866                                                  | 0.55                                                   | 0.89                                         |
| <b>HKUST-1</b>               | 1027                                                 | 0.54                                                   | 0.92                                         |

<sup>a</sup> From N<sub>2</sub>-sorption measurements at 77 K (Figure 4a), calculated BET area based on the adsorption points between p/p<sub>0</sub> = 0.01–0.1. <sup>b</sup> Determined based on the adsorption at p/p<sub>0</sub> = 0.9. <sup>c</sup> Calculated by non-local density functional theory (NLDFT) with the model “cylindrical pores at metal oxide”.

Matrix-assisted laser-desorption/ionization time-of-flight-mass spectroscopy (MALDI-TOF-MS)

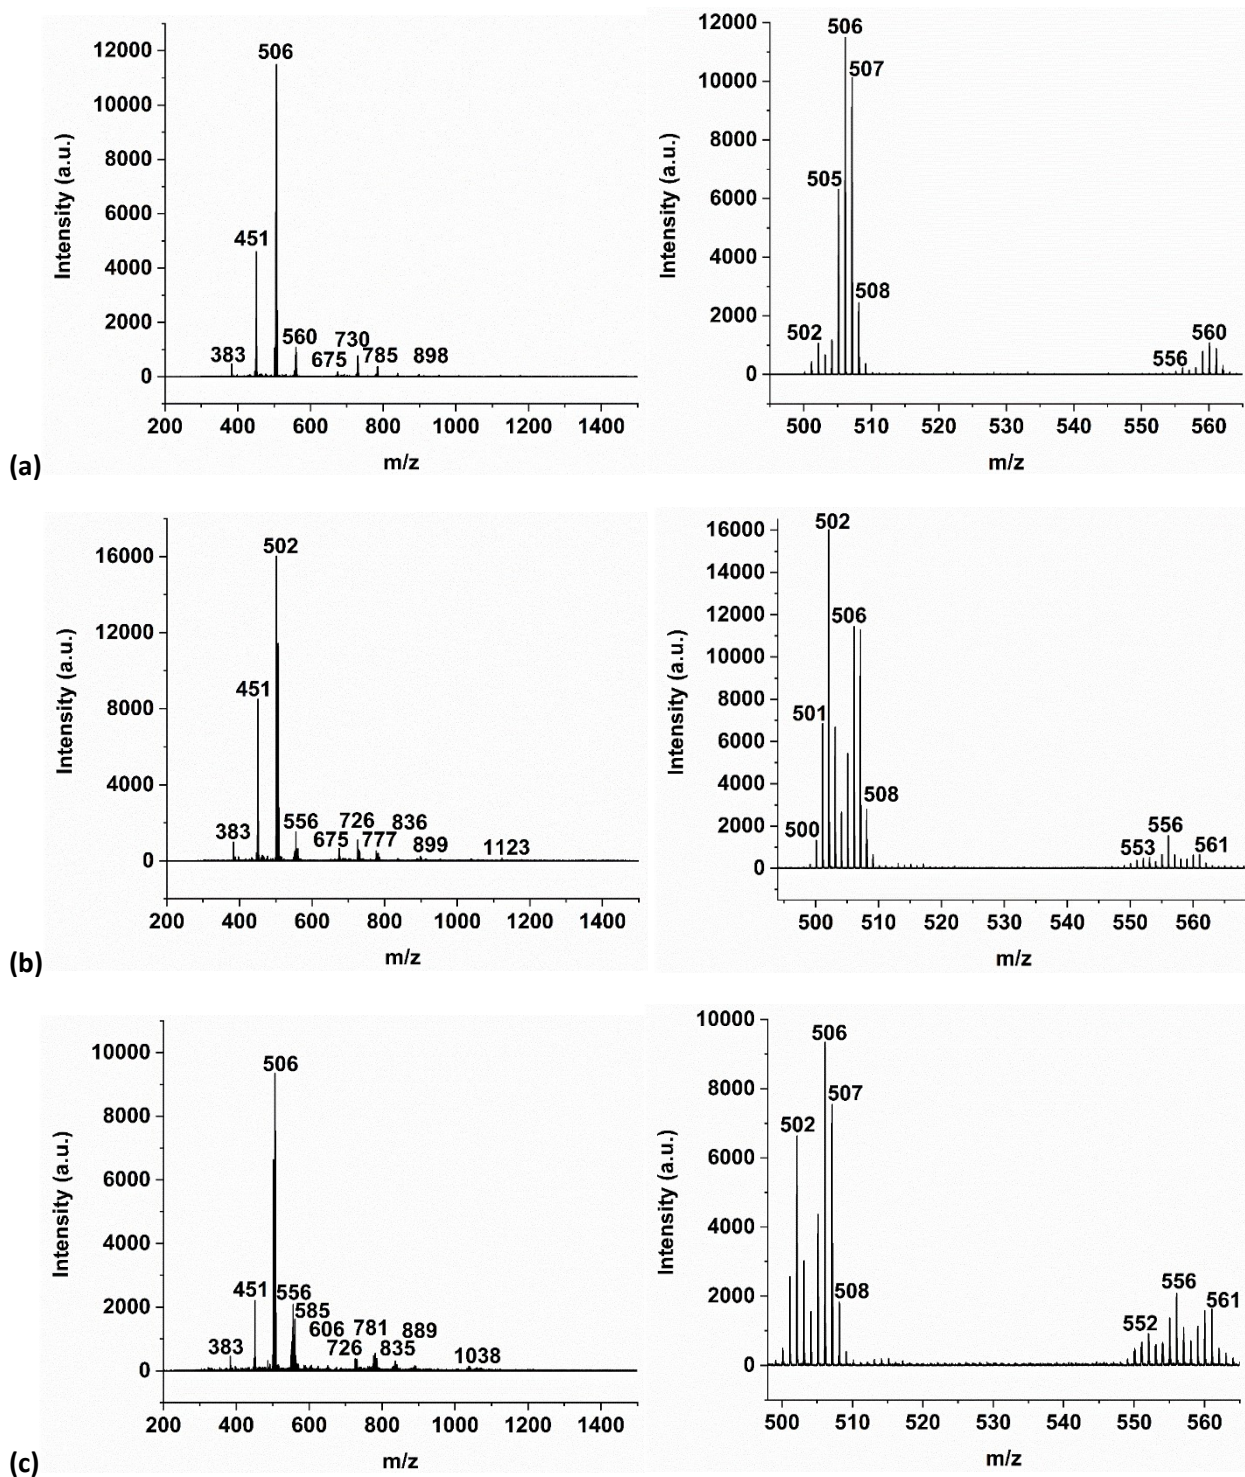

Fig. S14 MALDI-TOF-MS of (a) Cu<sub>6</sub>Ru-BTC, (b) Cu<sub>7</sub>Ru-BTC and (c) Cu<sub>10</sub>Ru-BTC.

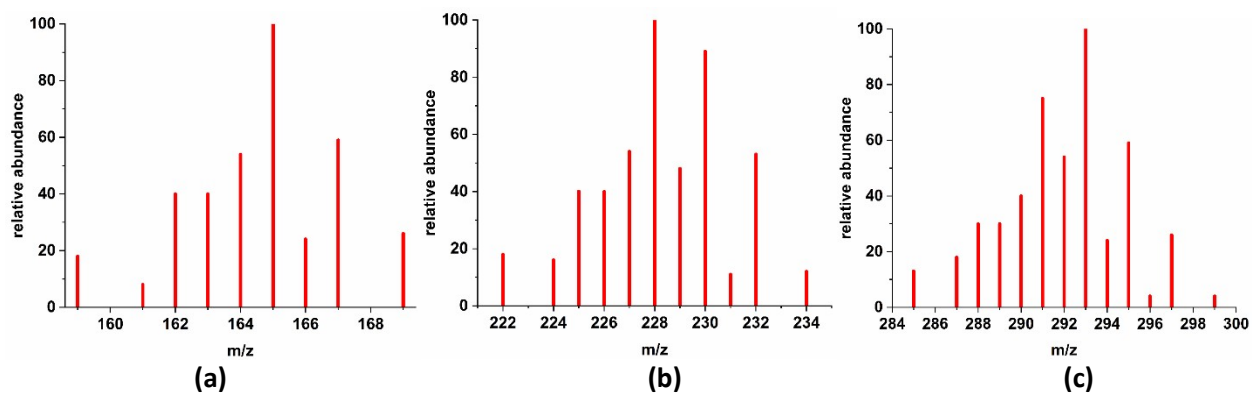

**Fig. S15** Calculation of theoretical isotope pattern of (a) CuRu, (b) Cu<sub>2</sub>Ru and (c) Cu<sub>3</sub>Ru.<sup>2</sup>

### X-ray photoelectron spectroscopy (XPS)

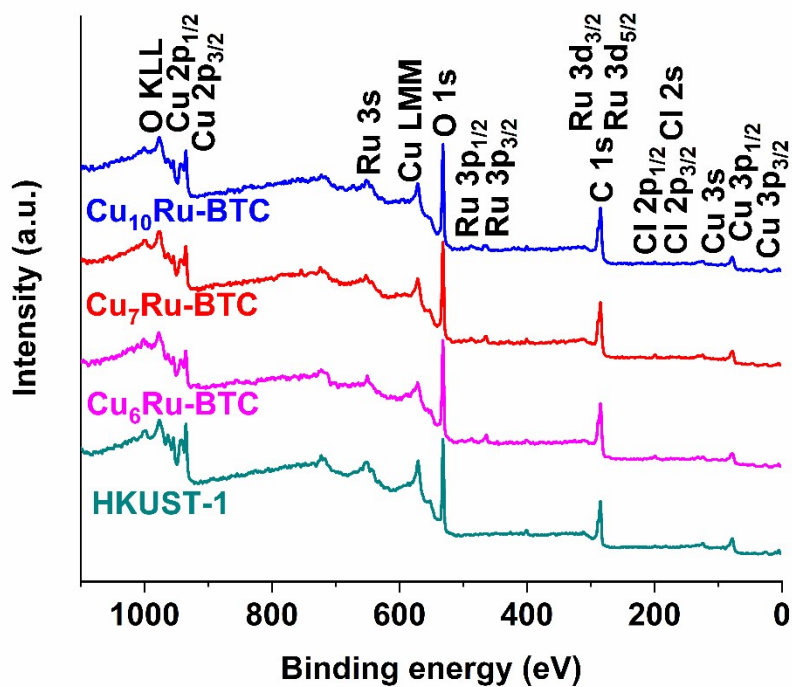

Fig. S16 XPS survey scans for Cu<sub>6</sub>Ru-BTC, Cu<sub>7</sub>Ru-BTC, Cu<sub>10</sub>Ru-BTC and mechanochemically synthesized HKUST-1.

### High-resolution X-ray photoelectron spectroscopy (HR-XPS)

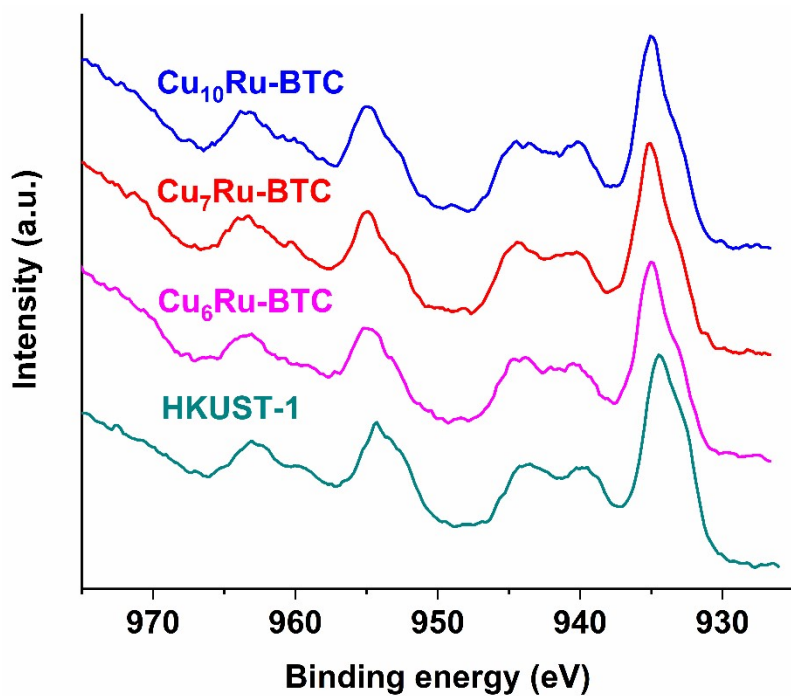

Fig. S17 HR-XPS spectra for the full measurement range of Cu for Cu<sub>6</sub>Ru-BTC, Cu<sub>7</sub>Ru-BTC, Cu<sub>10</sub>Ru-BTC and mechanochemically synthesized HKUST-1.

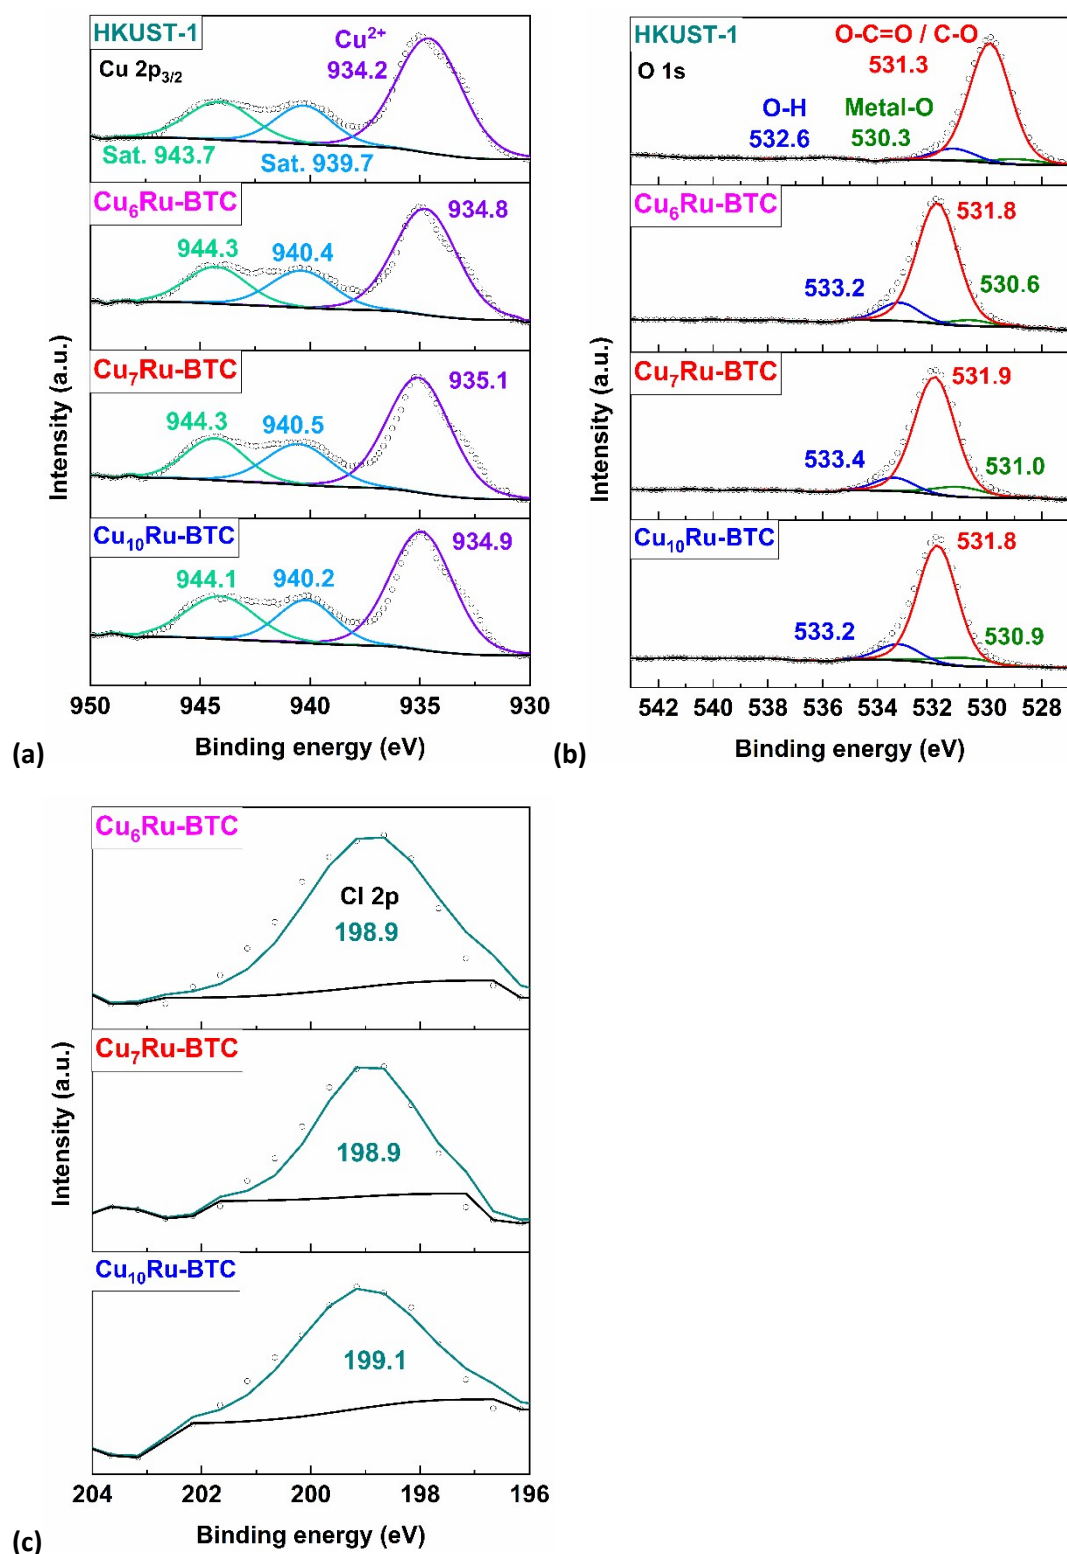

**Fig. S18** HR-XPS spectra of (a) Cu 2p<sub>3/2</sub>, (b) O 1s and (c) Cl 2p for Cu<sub>6</sub>Ru-BTC, Cu<sub>7</sub>Ru-BTC, Cu<sub>10</sub>Ru-BTC and mechanochemically synthesized HKUST-1.

## Electrochemical Data

### Chronopotentiometry

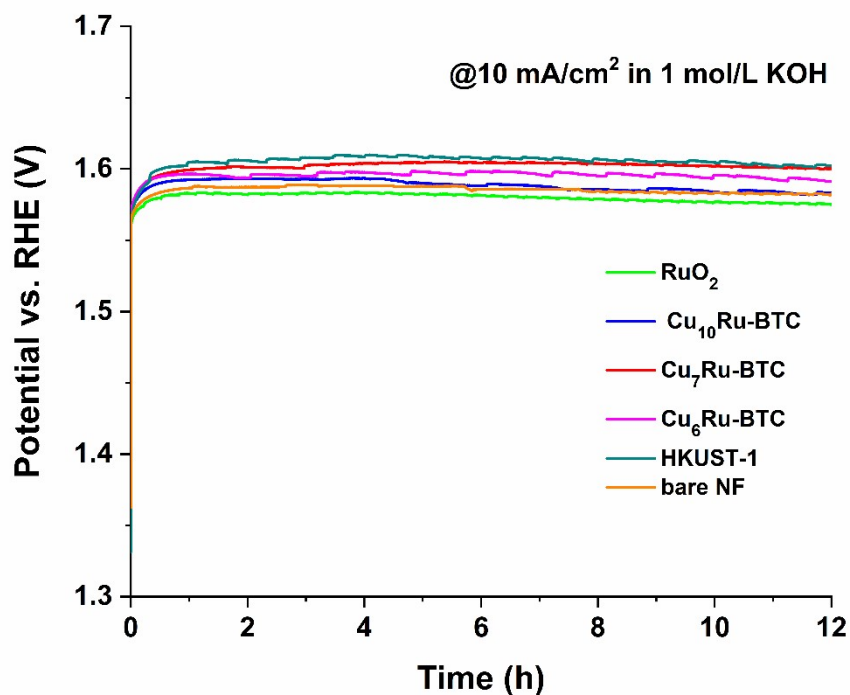

Fig. S19 Chronopotentiometry of Cu<sub>6</sub>Ru-BTC, Cu<sub>7</sub>Ru-BTC, Cu<sub>10</sub>Ru-BTC, mechanochemically synthesized HKUST-1, RuO<sub>2</sub> and bare NF for 12 h at a current density of 10 mA/cm<sup>2</sup> in 1 mol/L KOH.

### Overpotentials, Tafel slopes and charge-transfer resistances

Table S5 Overpotentials at 10 mA/cm<sup>2</sup> and 50 mA/cm<sup>2</sup>, Tafel slope and R<sub>CT</sub> for all samples tested.

| Sample                  | $\eta$ @ 10 mA/cm <sup>2</sup> (mV)<br>before → after 1000 cycles | $\eta$ @ 50 mA/cm <sup>2</sup> (mV)<br>before → after 1000 cycles | Tafel slope<br>(mV/dec) | R <sub>CT</sub> (Ω) |
|-------------------------|-------------------------------------------------------------------|-------------------------------------------------------------------|-------------------------|---------------------|
| Cu <sub>10</sub> Ru-BTC | 308 → 314                                                         | 363 → 361                                                         | 55                      | 13.6                |
| Cu <sub>7</sub> Ru-BTC  | 339 → 319                                                         | 397 → 364                                                         | 53                      | 56.1                |
| Cu <sub>6</sub> Ru-BTC  | 376 → 327                                                         | 436 → 376                                                         | 63                      | 204.5               |
| HKUST-1                 | 432 → 325                                                         | N/A → 372                                                         | 54                      | 542.4               |
| RuO <sub>2</sub>        | 344 → 312                                                         | 395 → 357                                                         | 47                      | 52.8                |
| Bare NF                 | 353 → 316                                                         | 400 → 360                                                         | 46                      | 134.2               |

### Electrochemical surface areas (ECSAs)

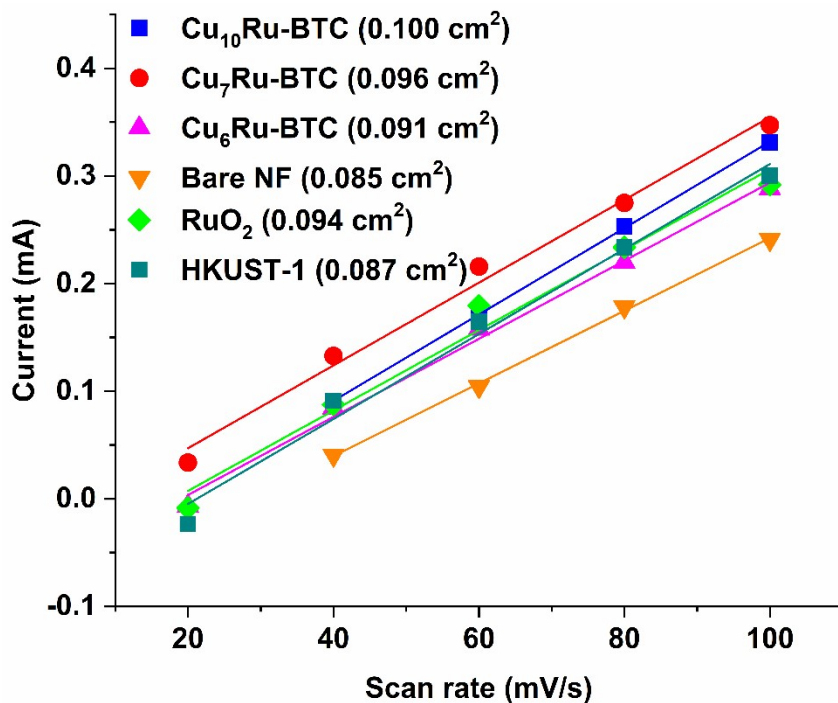

**Fig. S20** Scan rate vs. current plot of Cu<sub>6</sub>Ru-BTC, Cu<sub>7</sub>Ru-BTC, Cu<sub>10</sub>Ru-BTC, mechanochemically synthesized HKUST-1, RuO<sub>2</sub> and bare NF with their corresponding ECSAs.

**Table S6** Double-layer capacitance and ECSA as derived from the current vs. scan rate plot (Fig. S20)

|                         | Cu <sub>10</sub> Ru-BTC | Cu <sub>7</sub> Ru-BTC | Cu <sub>6</sub> Ru-BTC | HKUST-1 | RuO <sub>2</sub> | Bare NF |
|-------------------------|-------------------------|------------------------|------------------------|---------|------------------|---------|
| C <sub>DL</sub> (μF)    | 4.01                    | 3.85                   | 3.63                   | 3.48    | 3.74             | 3.66    |
| ECSA (cm <sup>2</sup> ) | 0.100                   | 0.096                  | 0.091                  | 0.087   | 0.094            | 0.085   |

### Faradaic efficiencies (FE)

**Table S7** FE without and with correction by the detected percentage of oxygen from a measurement without any applied current to consider the oxygen portion coming from ambient air, which is ascribed to a potential leak in the system.

|                           | Cu <sub>10</sub> Ru-BTC | Cu <sub>7</sub> Ru-BTC | Cu <sub>6</sub> Ru-BTC | HKUST-1 | RuO <sub>2</sub> | Bare NF |
|---------------------------|-------------------------|------------------------|------------------------|---------|------------------|---------|
| FE (%) without correction | 86                      | 84                     | 82                     | 80      | 82               | 77      |
| FE (%) with correction    | 70                      | 68                     | 66                     | 64      | 66               | 61      |



## Physical mixtures of CuO : RuO<sub>2</sub> at different molar ratios

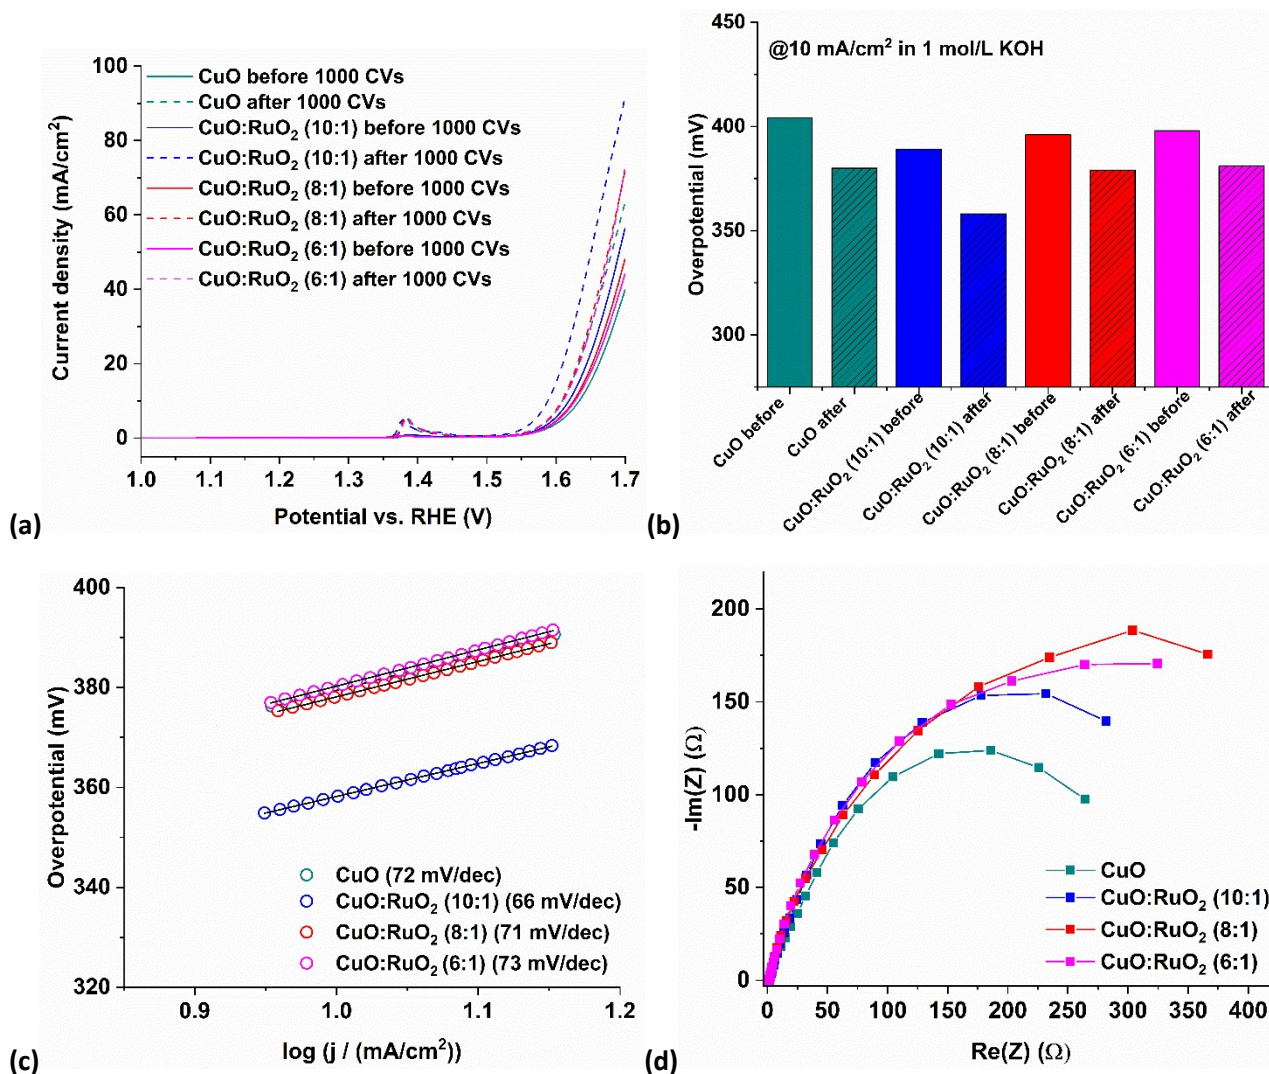

**Fig. S21** (a) LSV curves before and after 1000 CVs of CuO and the physical mixtures of CuO:RuO<sub>2</sub> (molar ratio 10:1), CuO:RuO<sub>2</sub> (8:1) and CuO:RuO<sub>2</sub> (6:1) as an ink on nickel foam (NF). (b) Overpotentials calculated from the LSV curves in (a). (c) Tafel plots for CuO and the physical mixtures of CuO:RuO<sub>2</sub> (molar ratio 10:1), CuO:RuO<sub>2</sub> (8:1) and CuO:RuO<sub>2</sub> (6:1). (d) Nyquist plots gathered from EIS for CuO and the physical mixtures of CuO:RuO<sub>2</sub> (molar ratio 10:1), CuO:RuO<sub>2</sub> (8:1) and CuO:RuO<sub>2</sub> (6:1).

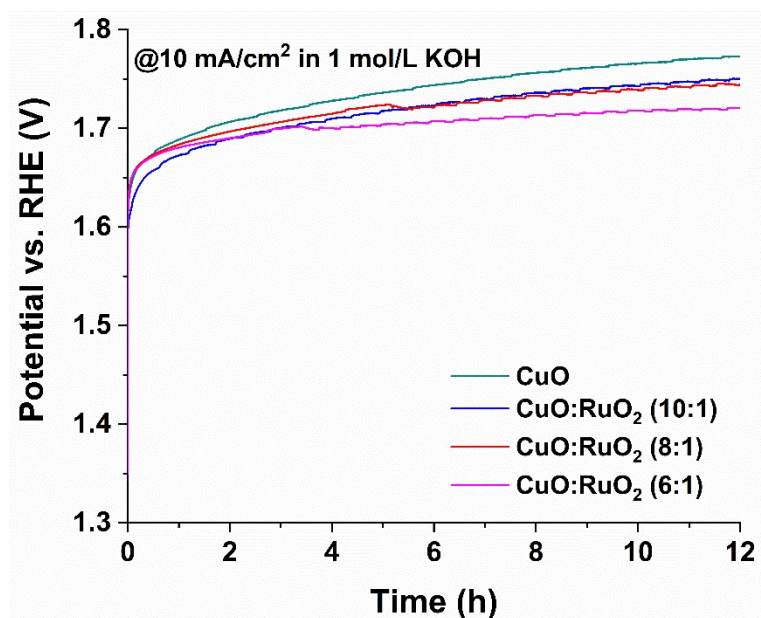

Fig. S22 Chronopotentiometry of CuO and the physical mixtures of CuO:RuO<sub>2</sub> (molar ratio 10:1), CuO:RuO<sub>2</sub> (8:1) and CuO:RuO<sub>2</sub> (6:1) for 12 h at a current density of 10 mA/cm<sup>2</sup> in 1 mol/L KOH.

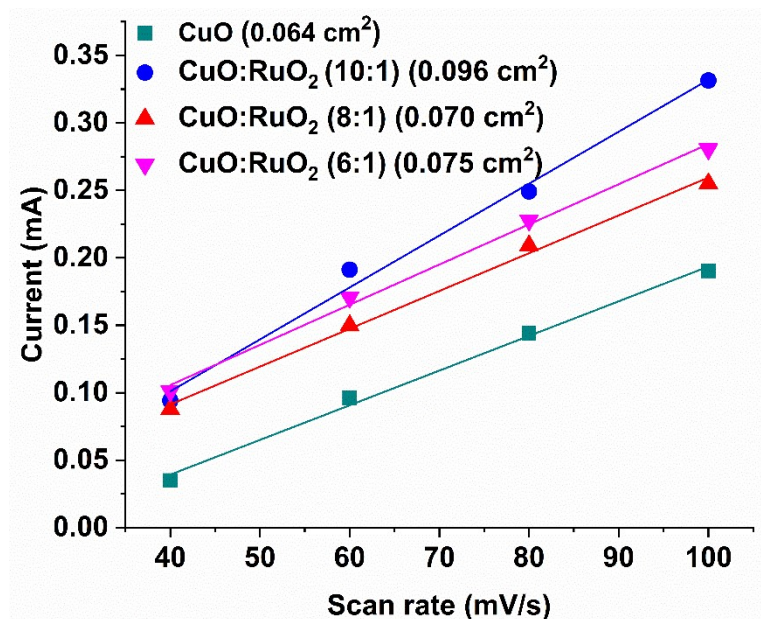

Fig. S23 Current vs. scan rate plot of CuO and the physical mixtures of CuO:RuO<sub>2</sub> (molar ratio 10:1), CuO:RuO<sub>2</sub> (8:1) and CuO:RuO<sub>2</sub> (6:1) with their corresponding electrochemical surface areas, ECSAs.

**Table S8** Overpotentials at 10 mA/cm<sup>2</sup> and 50 mA/cm<sup>2</sup>, Tafel slope and R<sub>CT</sub> for CuO and the physical mixtures of CuO:RuO<sub>2</sub> (molar ratio 10:1), CuO:RuO<sub>2</sub> (8:1) and CuO:RuO<sub>2</sub> (6:1).

| Sample                            | $\eta$ @ 10 mA/cm <sup>2</sup> (mV)<br>before → after 1000<br>cycles | $\eta$ @ 50 mA/cm <sup>2</sup> (mV)<br>before → after 1000<br>cycles | Tafel slope<br>(mV/dec) | R <sub>CT</sub> (Ω) |
|-----------------------------------|----------------------------------------------------------------------|----------------------------------------------------------------------|-------------------------|---------------------|
| <b>CuO</b>                        | 404 → 380                                                            | N/A → 451                                                            | 72                      | 369.5               |
| <b>CuO:RuO<sub>2</sub> (10:1)</b> | 389 → 358                                                            | 462 → 421                                                            | 66                      | 407.5               |
| <b>CuO:RuO<sub>2</sub> (8:1)</b>  | 396 → 379                                                            | N/A → 445                                                            | 71                      | 516.2               |
| <b>CuO:RuO<sub>2</sub> (6:1)</b>  | 398 → 381                                                            | N/A → 447                                                            | 73                      | 470.5               |

**Table S9** Double-layer capacitance and ECSA as derived from the current vs. scan rate plot (Fig. S23†).

|                              | <b>CuO</b> | <b>CuO:RuO<sub>2</sub> (10:1)</b> | <b>CuO:RuO<sub>2</sub> (8:1)</b> | <b>CuO:RuO<sub>2</sub> (6:1)</b> |
|------------------------------|------------|-----------------------------------|----------------------------------|----------------------------------|
| <b>C<sub>DL</sub> (μF)</b>   | 2.57       | 3.85                              | 2.80                             | 2.98                             |
| <b>ECSA (cm<sup>2</sup>)</b> | 0.064      | 0.096                             | 0.070                            | 0.075                            |

Post-mortem powder X-ray diffraction (PXRD) of  $\text{Cu}_{10}\text{Ru-BTC}$  and  $\text{RuCl}_3$  in KOH solution

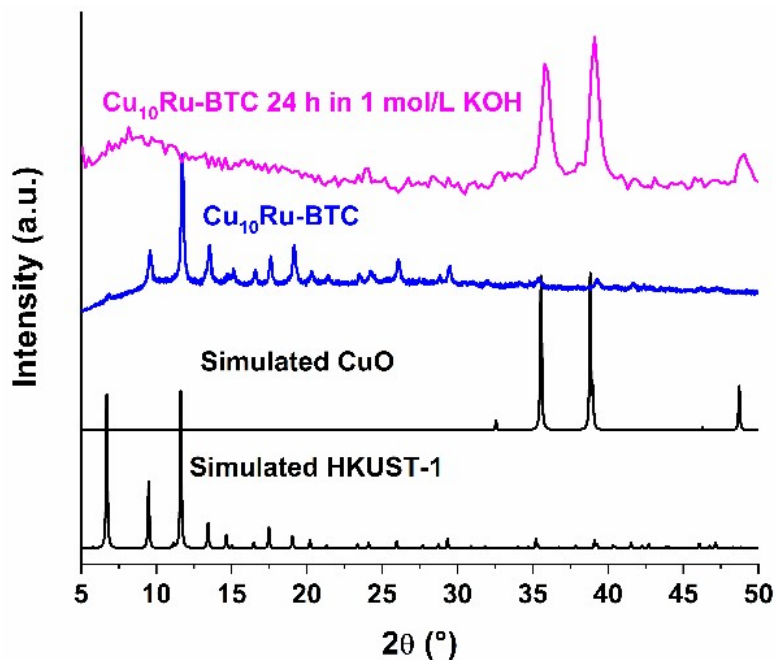

Fig. S24 PXRD patterns of  $\text{Cu}_{10}\text{Ru-BTC}$  following 24 h in 1 mol/L KOH solution, synthesized  $\text{Cu}_{10}\text{Ru-BTC}$ , simulated CuO (COD no. 15-26990) and simulated HKUST-1 (CCDC no. 112954).

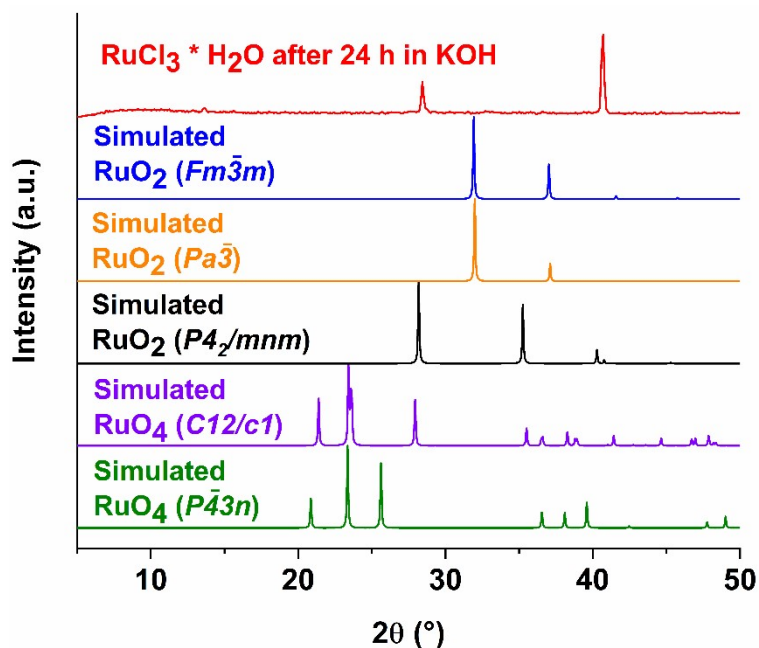

Fig. S25 PXRD patterns of  $\text{RuCl}_3 \cdot \text{H}_2\text{O}$  following the immersion for 24 h in 1 mol/L KOH solution and simulated patterns for different polymorphs of  $\text{RuO}_2$  (CCDC/ICSD no. 236962, 236965 and 251564) and  $\text{RuO}_4$  (CCDC/ICSD no. 415303 and 415306). Then the pattern for tetragonal  $\text{RuO}_2$  (space group  $P4_2/mnm$ ) is simulated with preferred orientation along (110) or (010) only the peak at  $28^\circ$  or  $40^\circ$   $2\theta$ , respectively, is seen (March-Dollase parameter 0.1 in both cases). Thus, the experimentally obtained  $\text{RuO}_2$  from the KOH treatment of  $\text{RuCl}_3 \cdot \text{H}_2\text{O}$  crystallizes predominantly in the (010) preferred orientations and less in the (110) orientation.

## Mechanochemical synthesis set-up

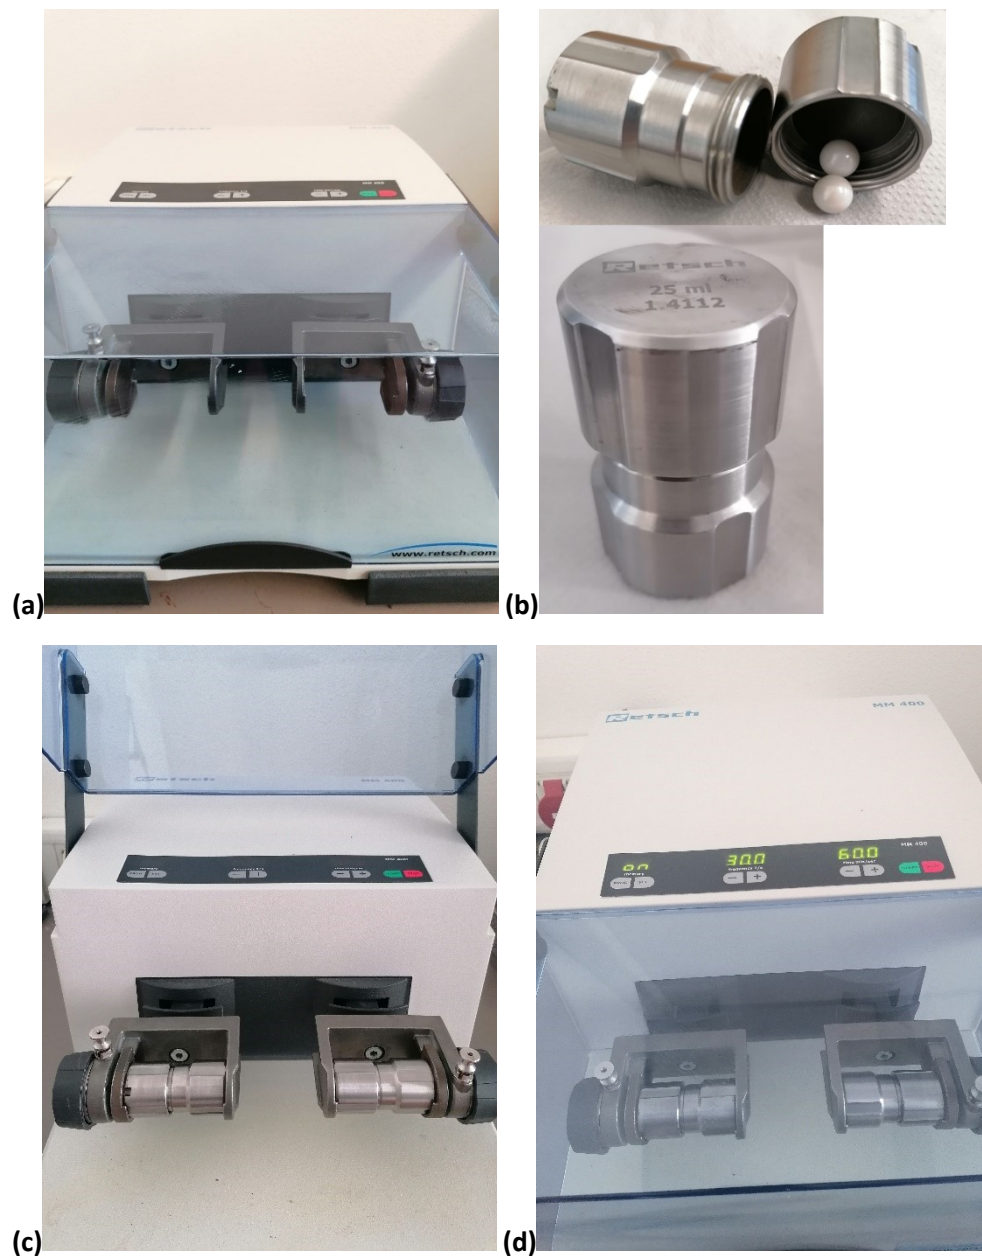

**Fig. S26** (a) Retsch MM400 mixer mill without vessels; (b) open and closed 25 mL vessel; (c) Retsch MM400 mixer mill with vessels; (d) Retsch MM400 mixer mill with vessels and input synthesis parameters.

## References

- 1 Y. Chen, X. Mu, E. Lester and T. Wu, *Prog. Nat. Sci.: Mater. Int.*, 2018, **28**, 584-589, DOI: 10.1016/j.pnsc.2018.08.002.
- 2 M. Loos, C. Gerber, F. Corona, J. Hollender and H. Singer, *Anal. Chem.*, 2015, **87**, 5738-5744, DOI: 10.1021/acs.analchem.5b00941.
